# Supplementary figures and images for: Evaluating the acceptability and feasibility of new mosquito bite prevention tools in a “forest pack” to support malaria elimination in Cambodia
Source: Research Square preprint supplement (doi:10.21203/rs.3.rs-6658684/v1), 2025-06-13

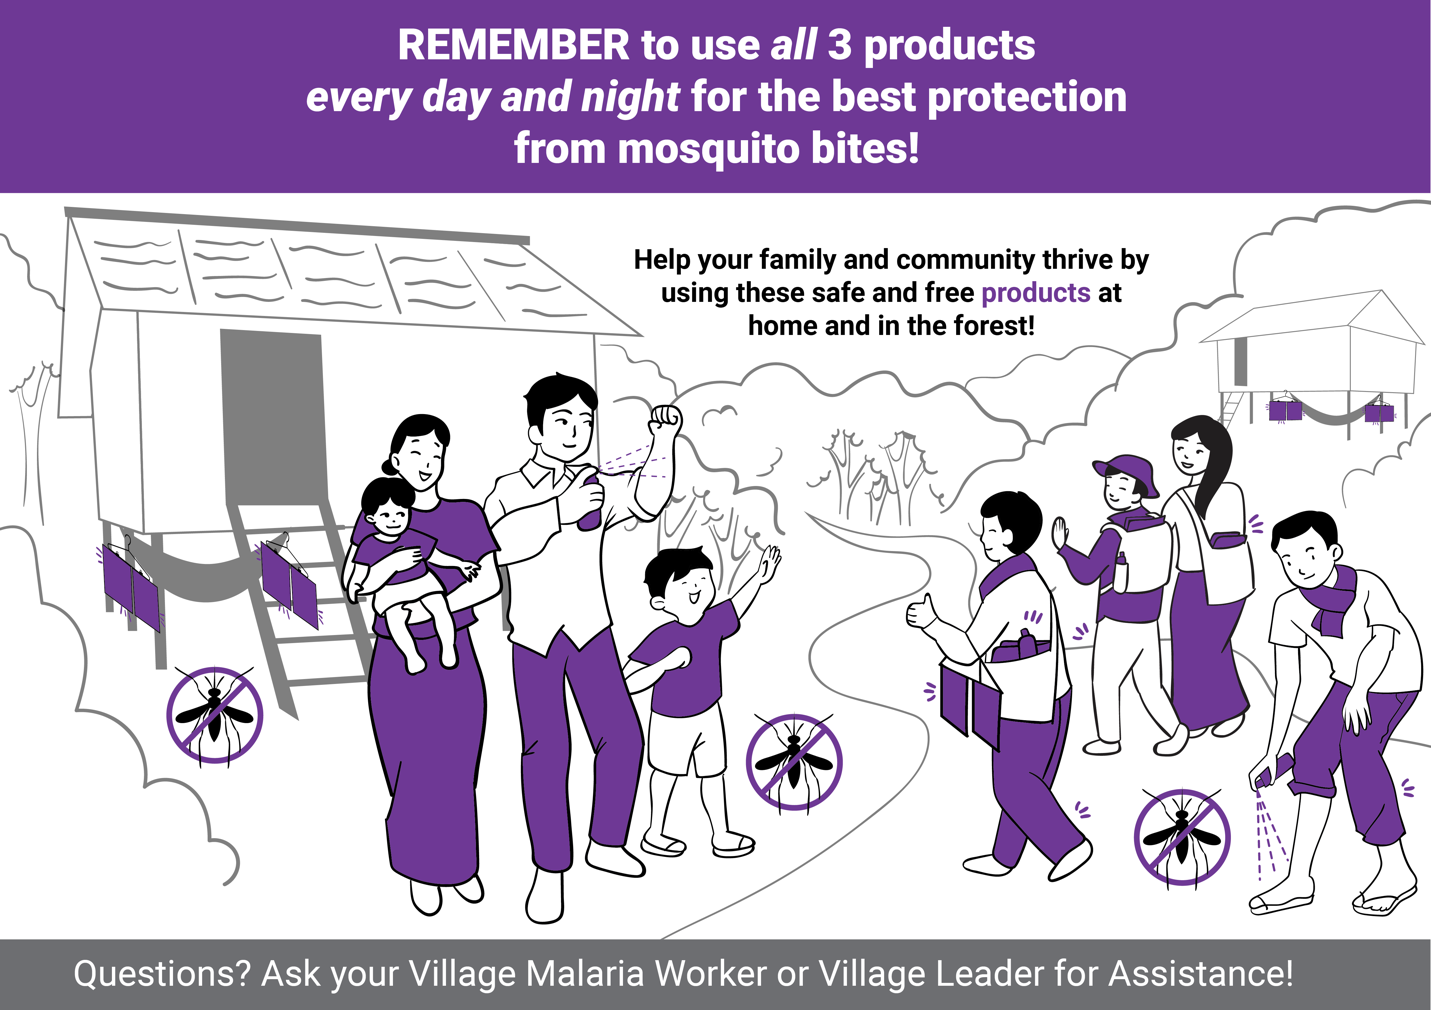

Supplement: Supplementary file 2 [file a799876c27e4a58f17d8d1c2.docx]
